# Supplementary material for: Targeting M2-TAM via STAT3/NF-kB/AKT Signaling Pathway With Oxaliplatin, Retinoic Acid, and Libidibia ferrea -Loaded Extracellular Vesicles From Macrophages 1 Down-Regulates Murine Colon Cancer Metastasis
Source: Preprints.org preprint supplement (doi:10.20944/preprints202305.1804.v1), 2023-05-25
Supplement: Supplementary file 2 [file supplementary]

**Targeting M2-TAM via STAT3/NF-kB/AKT signaling pathway with Oxaliplatin, retinoic acid and *L. ferrea* -loaded Extracellular vesicles from Macrophages 1 down-regulates murine colon cancer metastasis.**

Thaís Gomes de Carvalho1,4,5, Pablo Lara4,* Carla Jorquera-Cordero2, Cícero Flávio Soares Aragão6, Artur de Santana Oliveira6 ,Vinicius Barreto Garcia5, Shirley Vitória de Paiva Souza1,5 Isabelle de Lima Marques5, Luiz Alberto Lira Soares8, Paulo Marcos da Matta Guedes7,Raimundo Fernandes de Araújo Júnior1,4,5*

1Postgraduate Program in Health Science, Federal University of Rio Grande do Norte (UFRN), Natal, RN, Brazil.

2Department of Orthopedics, University Medical Center Utrecht, 3584 CX Utrecht, The Netherlands.

3Postgraduate Program in Pharmaceutical Sciences, Department of Pharmacology, Federal University of Rio Grande do Norte (UFRN), Natal, RN, Brazil.

4Department of Radiology, Leiden University Medical Center, Leiden, the Netherlands.

5Inflammation and Cancer Research Laboratory, Department of Morphology, Federal University of Rio Grande do Norte (UFRN), Natal, RN, Brazil.

6Medicines Quality Control Laboratory (LCQMed), Department of Pharmacy, Federal University of Rio Grande do Norte, Natal, Rio Grande do Norte, Brazil.

7Department of Parasitology and Microbiology and Post-Graduation Program in Parasite Biology, Federal University of Rio Grande do Norte, Natal, Rio Grande do Norte, Brazil.

8Post Graduation Program in Therapeutic Innovation, Department of Pharmaceutical Sciences, Federal University of Pernambuco (UFPE), Recife, PE, Brazil.

**Conflict of Interest Statement:**

The authors declare no potential conflicts of interest.

***Correspondence to:**

Prof. Raimundo Fernandes de Araujo Junior, University Campus, Federal University of Rio Grande do Norte, Morphology Department, Brazil. Phone: +558498934310 Email: [fernandes.araujo@ufrn.br](mailto:fernandes.araujo@ufrn.br)

Dr. Pablo Lara. Department of Radiology, Leiden University Medical Center, Leiden, the Netherlands. Phone: +31 6 21180677. Email: p.lara_arenas@lumc.nl

**SUPPLEMENTARY TABLES**

**Table01**. List of antibodies used in the study.

| Antibodies | Cat. Number | Manufacturers |
| --- | --- | --- |
| PI3K | SC-1637 | Santa Cruz Biotechnology, (Santa Cruz, CA, USA), |
| AKT-1 | 293125 | Santa Cruz Biotechnology, (Santa Cruz, CA, USA), |
| CD163 | 16646-1-AP | ProteinTech (Rosemont, IL, USA) |
| E-Cadherin | MA5-12547 | Thermo Fisher Scientific (Waltham, MA, USA) |
| VEGF-A | PB9071 | Boster Biological Technology Pleasanton, CA, USA |
| NF-KB | SC-8008 | Santa Cruz Biotechnology, (Santa Cruz, CA, USA), |
| CXCL12 | PA5-114344 | Protein Tech (Rosemont, IL, USA) |
| Vimentin | MA5-16409 | Thermo Fisher Scientific (Waltham, MA, USA) |
| MMP2 | sc-13595 | Santa Cruz Biotechnology, (Santa Cruz, CA, USA), |
| IL-4 | 214-14 | PeproTech (Rocky Hill, NJ, USA) |
| IFN-γ | 315-05 | PeproTech (Rocky Hill, NJ, USA) |
| IL-10 | PA5-85660 | Santa Cruz Biotechnology, (Santa Cruz, CA, USA), |
| PDL-1 | 66248-1-Ig | Protein Tech (Rosemont, IL, USA) |
| Alexa® Fluor 488 | A32731 | Thermo Fisher Scientific (Waltham, MA, USA) |
| Alexa® Fluor 555 | A-21428 | Thermo Fisher Scientific (Waltham, MA, USA) |
| CD163-PerCP | 46-1631-82 | Thermo Fisher Scientific (Waltham, MA, USA) |
| CD68-FITC | MA5-16676 | Thermo Fisher Scientific (Waltham, MA, USA) |

**SUPPLEMENTARY FIGURES**


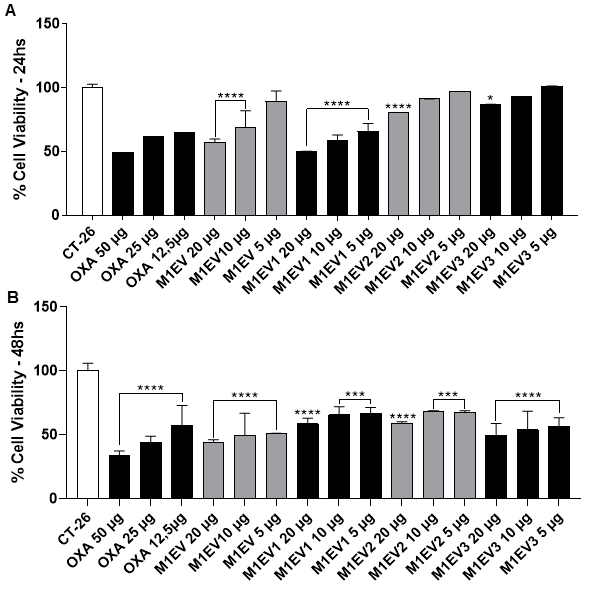


**Figure 1 S -** Graphical representation of cell viability (A-B)**. OXA**: oxaliplatin, **M1EV:** M1-EVs, **M1EV1:** M1-EVs with OXA, **M1EV2**: M1-EVs with OXA+ retinoic acid, **M1EV3**: M1-EVs with OXA+*L. ferrea***.** Results are presented expressed by mean ± SD. All treated cells were compared to the CT-26 cells without treatment (**p*<0.05, ***p*<0.01, ****p*<0.001, and *****p*<0.0001).


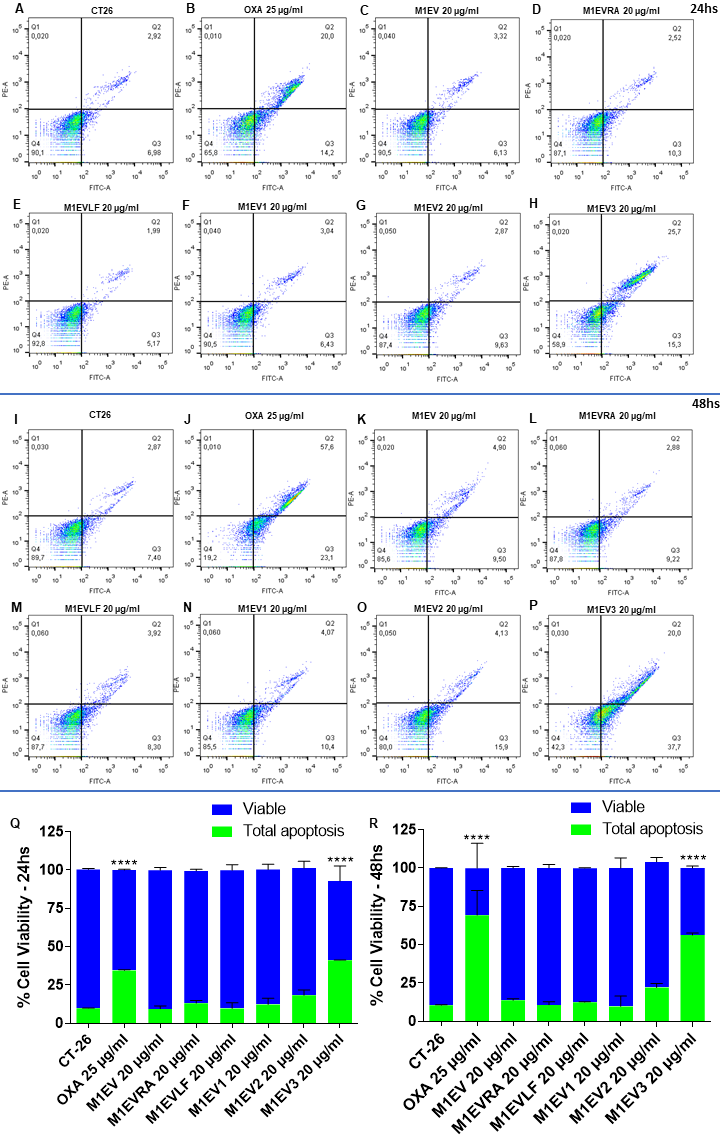


**Figure 2 S -** Effect of M1EVs on total cell death in 24 hs and 48hs. The cell death profile was analyzed by flow cytometry (A-P). Graphical representation expresses the percentage of total death. **OXA**: oxaliplatin, **M1EV:** M1-EVs, **M1EV1:** M1-EVs with OXA, **M1EV2**: M1-EVs with OXA+ retinoic acid, **M1EV3**: M1-EVs with OXA+*L. ferrea***.** Results are presented expressed by mean ± SD. All treated cells were compared to the CT-26 cells without treatment (**p*<0.05, ***p*<0.01, ****p*<0.001, and *****p*<0.0001).
